# Supplementary material
Source: Springer Nature journal article supplement (http://www.springermedizin.de/resource/supplementary/12992_2012_181_MOESM2_ESM.pdf/9616636)

Study designed by Sheikh and Naqvi in view of the prevalent enthusiasm for migration among classmates

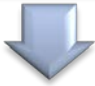

Questionnaire developed with the help of Department of Community Medicine and extensive literature search

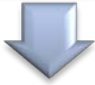

Questionnaire pretested on a group of 15 students; changed accordingly

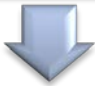

Ethical Approval taken from Ethical Review Board, Dow University of Health Sciences for final questionnaire and protocol

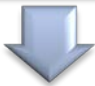

Convenient sampling employed. Students approached during break time in "high traffic". Interns approached in their respective wards.

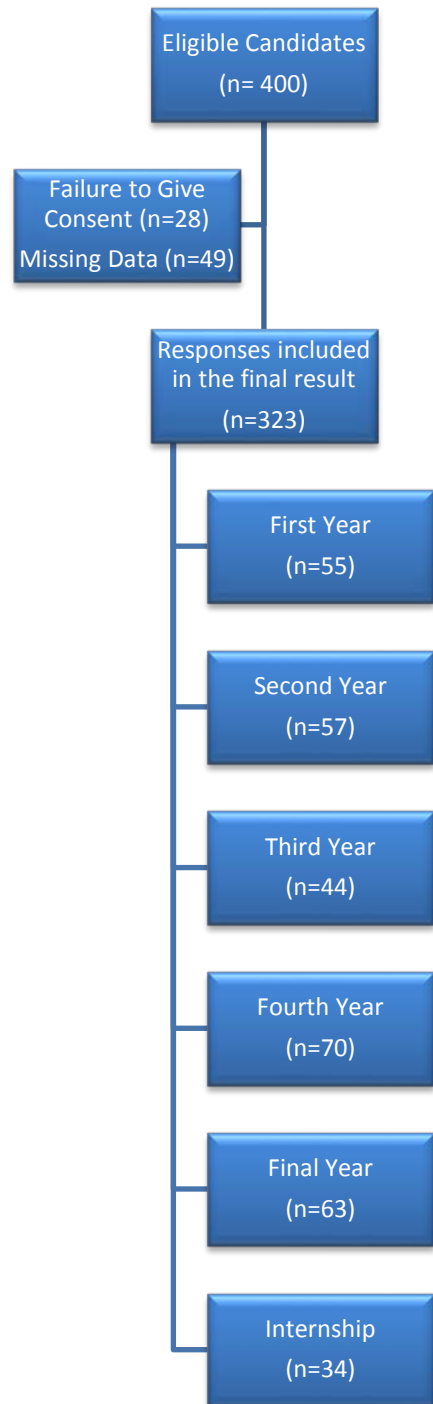

Supplement: MOESM2 [file 9616636]
